# Supplementary material for: Decatungstate acid improves the photo-induced electron lifetime and retards the recombination in dye sensitized solar cells
Source: Royal Society of Chemistry journal article supplement (doi:10.1039/c6dt02584f), 2016-01-01
Supplement: c6dt02584f1.pdf [file c6dt02584f1.pdf]

# Decatungstate Acid Improve Photo-induced Electron Lifetime and Retard the Recombination in Dye Sensitized Solar Cells

Liang Li,<sup>a,b,c</sup> Yulin Yang,<sup>\*a</sup> Ruiqing Fan,<sup>\*a</sup> Jian Liu<sup>\*b</sup>, Yanxia Jiang,<sup>a</sup> Bin Yang,<sup>d</sup> Wenwu Cao<sup>d,e</sup>

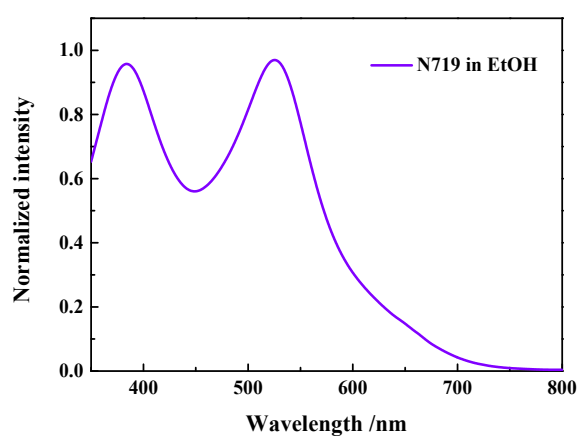

Figure S1 UV-visible absorption spectrum of N719 dye in EtOH.

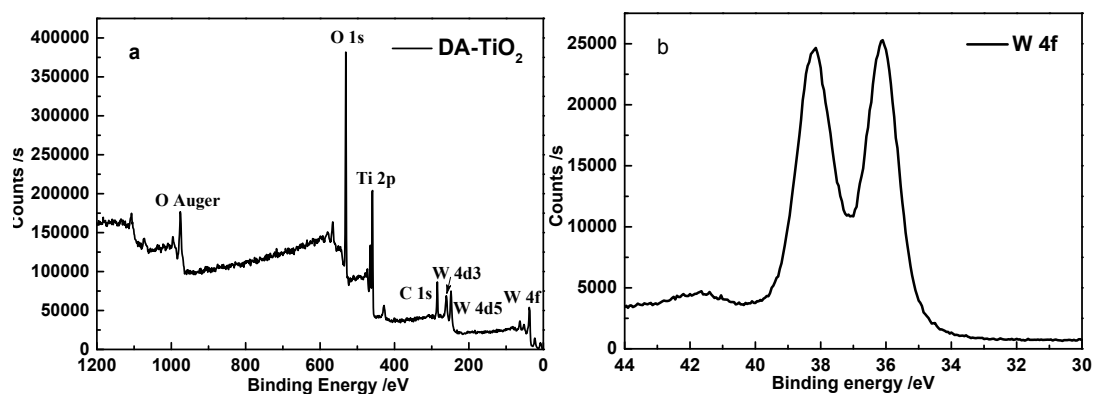

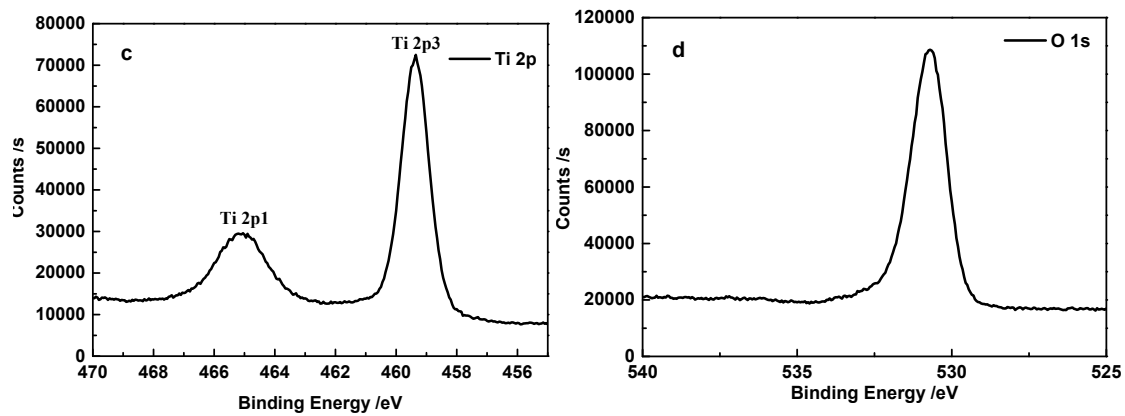

Figure S2. XPS of DA-TiO<sub>2</sub>: a) survey; b) W 4f; c) Ti 2p; d) O 1s.
